# Supplementary material for: Polly Wants a Genome: The Lack of Genetic Testing for Pet Parrot Species
Source: MDPI journal article supplement (doi:10.3390/genes12071097), 2021-07-20
Supplement: s1 [file s1]

## Supplementary file S1

List of parrot species with regularly occurring plumage colour variations.

European Association of Zoos and Aquaria - Parrot Taxon Advisory Group: Simon Bruslund, Marlow Birdpark, chair

| Common name                | Scientific name                          |
|----------------------------|------------------------------------------|
| Cockatiel                  | <u><i>Nymphicus hollandicus</i></u>      |
| Red-tailed Black-cockatoo  | <u><i>Calyptrorhynchus banksii</i></u>   |
| Galah                      | <u><i>Eolophus roseicapilla</i></u>      |
| Grey Parrot                | <u><i>Psittacus erithacus</i></u>        |
| Brown Parrot               | <u><i>Poicephalus meyeri</i></u>         |
| Senegal Parrot             | <u><i>Poicephalus senegalus</i></u>      |
| Grey-hooded Parakeet       | <u><i>Psilopsiagon aymara</i></u>        |
| Mountain Parakeet          | <u><i>Psilopsiagon aurifrons</i></u>     |
| Barred Parakeet            | <u><i>Bolborhynchus lineola</i></u>      |
| Monk Parakeet              | <u><i>Myiopsitta monachus</i></u>        |
| Dusky Parrot               | <u><i>Pionus fuscus</i></u>              |
| Blue-headed Parrot         | <u><i>Pionus menstruus</i></u>           |
| White-crowned Parrot       | <u><i>Pionus senilis</i></u>             |
| Southern Festive Amazon    | <u><i>Amazona festiva</i></u>            |
| Cuban Amazon               | <u><i>Amazona leucocephala</i></u>       |
| Red-lored Amazon           | <u><i>Amazona autumnalis</i></u>         |
| Yellow-headed Amazon       | <u><i>Amazona oratrix</i></u>            |
| Yellow-naped Amazon        | <u><i>Amazona auropalliata</i></u>       |
| Yellow-crowned Amazon      | <u><i>Amazona ochrocephala</i></u>       |
| Turquoise-fronted Amazon   | <u><i>Amazona aestiva</i></u>            |
| Orange-winged Amazon       | <u><i>Amazona amazonica</i></u>          |
| Mexican Parrotlet          | <u><i>Forpus cyanopygius</i></u>         |
| Green-rumped Parrotlet     | <u><i>Forpus passerinus</i></u>          |
| Turquoise-winged Parrotlet | <u><i>Forpus spengeli</i></u>            |
| Blue-winged Parrotlet      | <u><i>Forpus xanthopterygius</i></u>     |
| Spectacled Parrotlet       | <u><i>Forpus conspicillatus</i></u>      |
| Pacific Parrotlet          | <u><i>Forpus coelestis</i></u>           |
| Black-headed Parrot        | <u><i>Pionites melanocephalus</i></u>    |
| Green-thighed Parrot       | <u><i>Pionites leucogaster</i></u>       |
| Maroon-bellied Parakeet    | <u><i>Pyrrhura frontalis</i></u>         |
| Pearly Parakeet            | <u><i>Pyrrhura lepidula</i></u>          |
| Green-cheeked Parakeet     | <u><i>Pyrrhura molinae</i></u>           |
| Maroon-tailed Parakeet     | <u><i>Pyrrhura melanura</i></u>          |
| Burrowing Parrot           | <u><i>Cyanoliseus patagonus</i></u>      |
| Hyacinth Macaw             | <u><i>Anodorhynchus hyacinthinus</i></u> |
| Orange-fronted Parakeet    | <u><i>Eupsittula canicularis</i></u>     |

|                               |                                             |
|-------------------------------|---------------------------------------------|
| Dusky-headed Parakeet         | <u><i>Aratinga weddellii</i></u>            |
| Nanday Parakeet               | <u><i>Aratinga nenday</i></u>               |
| Sun Parakeet                  | <u><i>Aratinga solstitialis</i></u>         |
| Jandaya Parakeet              | <u><i>Aratinga jandaya</i></u>              |
| Blue-winged Macaw             | <u><i>Primolius maracana</i></u>            |
| Blue-and-yellow Macaw         | <u><i>Ara ararauna</i></u>                  |
| Military Macaw                | <u><i>Ara militaris</i></u>                 |
| Great Green Macaw             | <u><i>Ara ambiguus</i></u>                  |
| Scarlet Macaw                 | <u><i>Ara macao</i></u>                     |
| Red-and-green Macaw           | <u><i>Ara chloropterus</i></u>              |
| Northern Red-shouldered Macaw | <u><i>Diopsittaca nobilis</i></u>           |
| Blue-crowned Parakeet         | <u><i>Psittacara acuticaudatus</i></u>      |
| Mitred Parakeet               | <u><i>Psittacara mitratus</i></u>           |
| Red-rumped Parrot             | <u><i>Psephotus haematonotus</i></u>        |
| Bluebonnet                    | <u><i>Northiella haematogaster</i></u>      |
| Mulga Parrot                  | <u><i>Psephotellus varius</i></u>           |
| Crimson Rosella               | <u><i>Platycercus elegans</i></u>           |
| Pale-headed Rosella           | <u><i>Platycercus adscitus</i></u>          |
| Eastern Rosella               | <u><i>Platycercus eximius</i></u>           |
| Swift Parrot                  | <u><i>Lathamus discolor</i></u>             |
| Ouvea Parakeet                | <u><i>Eunymphicus uvaeensis</i></u>         |
| Yellow-crowned Parakeet       | <u><i>Cyanoramphus auriceps</i></u>         |
| Red-crowned Parakeet          | <u><i>Cyanoramphus novaezelandiae</i></u>   |
| Bourke's Parrot               | <u><i>Neopsephotus bourkii</i></u>          |
| Blue-winged Parrot            | <u><i>Neophema chrysostoma</i></u>          |
| Elegant Parrot                | <u><i>Neophema elegans</i></u>              |
| Turquoise Parrot              | <u><i>Neophema pulchella</i></u>            |
| Scarlet-chested Parrot        | <u><i>Neophema splendida</i></u>            |
| Papuan Lorikeet               | <u><i>Charmosyna papou</i></u>              |
| Stella's Lorikeet             | <u><i>Charmosyna stellae</i></u>            |
| Musk Lorikeet                 | <u><i>Glossopsitta concinna</i></u>         |
| Chattering Lory               | <u><i>Lorius garrulus</i></u>               |
| Black-capped Lory             | <u><i>Lorius lory</i></u>                   |
| Violet-necked Lory            | <u><i>Eos squamata</i></u>                  |
| Coconut Lorikeet              | <u><i>Trichoglossus haematodus</i></u>      |
| Rainbow Lorikeet              | <u><i>Trichoglossus moluccanus</i></u>      |
| Red-collared Lorikeet         | <u><i>Trichoglossus rubritorquis</i></u>    |
| Scaly-breasted Lorikeet       | <u><i>Trichoglossus chlorolepidotus</i></u> |
| Budgerigar                    | <u><i>Melopsittacus undulatus</i></u>       |
| Double-eyed Fig-parrot        | <u><i>Cyclopsitta diophthalma</i></u>       |
| Vernal Hanging-parrot         | <u><i>Loriculus vernalis</i></u>            |
| Blue-crowned Hanging-parrot   | <u><i>Loriculus galgulus</i></u>            |

|                          |                                         |
|--------------------------|-----------------------------------------|
| Rosy-faced Lovebird      | <u><i>Agapornis roseicollis</i></u>     |
| Fischer's Lovebird       | <u><i>Agapornis fischeri</i></u>        |
| Yellow-collared Lovebird | <u><i>Agapornis personatus</i></u>      |
| Nyasa Lovebird           | <u><i>Agapornis lilianae</i></u>        |
| Black-cheeked Lovebird   | <u><i>Agapornis nigrigenis</i></u>      |
| Superb Parrot            | <u><i>Polytelis swainsonii</i></u>      |
| Regent Parrot            | <u><i>Polytelis anthopeplus</i></u>     |
| Princess Parrot          | <u><i>Polytelis alexandrae</i></u>      |
| Australian King-parrot   | <u><i>Alisterus scapularis</i></u>      |
| Red-winged Parrot        | <u><i>Aprosmictus erythropterus</i></u> |
| Eclectus Parrot          | <u><i>Eclectus roratus</i></u>          |
| Grey-headed Parakeet     | <u><i>Psittacula finschii</i></u>       |
| Slaty-headed Parakeet    | <u><i>Psittacula himalayana</i></u>     |
| Blossom-headed Parakeet  | <u><i>Psittacula roseata</i></u>        |
| Plum-headed Parakeet     | <u><i>Psittacula cyanocephala</i></u>   |
| Red-breasted Parakeet    | <u><i>Psittacula alexandri</i></u>      |
| Alexandrine Parakeet     | <u><i>Psittacula eupatria</i></u>       |
| Rose-ringed Parakeet     | <u><i>Psittacula krameri</i></u>        |
